# Supplementary material for: Kindlin-2 inhibits TNF/NF-κB-Caspase 8 pathway in hepatocytes to maintain liver development and function
Source: eLife journal article supplement (doi:10.7554/elife.81792), 2023-01-09
Supplement: fig4-figsupp1-data1 [file Figure 4-Figure Supplement 1-Source data1.xlsx]

## Sheet: Figure 4-Figure Supplement 1a
			Figure 4-Figure Supplement 1a
		WT																	KO
		7.69	7.15	7.83	7.63	7.03	7.26	7.41	7.69	6.72	8	7.47	7.26	7.62	7.1	7.64	7.29	8.48	9.21	8.25	8.57	9.27	9.69	8.89	7.07	8.9

## Sheet: Figure 4-Figure Supplement 1b
						Figure 4-Figure Supplement 1b
		WT																	KO
		5.7	6.3	7.8	5.7	5.7	6.7	5.7	7.2	6.2	6.7	6.2	6.2	6.2	5.7	5.7	5.7	5.7	7.4	5.7	5.2	7.8	18.5	18.2	6.2	7.2

## Sheet: Figure 4-Figure Supplement 1c
		Figure 4-Figure Supplement 1c
	WT																	KO
	125	119	132	126	116	120	125	119	114	134	125	121	125	119	129	123	146	150	137	141	162	167	150	109	150

## Sheet: Figure 4-Figure Supplement 1d
			Figure 4-Figure Supplement 1d
			WT																	KO
			6.5	6	6.9	6	5.8	5.9	5.9	7	6	6.4	5.9	5.9	6.2	5.9	5.7	5.7	6.4	7.5	6.1	6.4	7.3	8.2	8.2	6	6.8

## Sheet: Figure 4-Figure Supplement 1e
			Figure 4-Figure Supplement 1e
		WT																	KO
		86.6	82	79.6	84.5	75.2	80.5	71.1	82.3	78.5	82.6	81.7	85.3	65.9	73.8	79.8	86.5	81.7	42	68.3	47.8	59.6	36.9	29.3	85.4	67

## Sheet: Figure 4-Figure Supplement 1f
		Figure 4-Figure Supplement 1f
		WT																	KO
		11.3	9.6	15.4	14.2	23.6	19	21.9	16.8	19	15.8	16.9	14.1	30.1	24.4	17.8	10.5	14	56.9	28.1	49	35.3	60.9	66.3	13.4	27.6

## Sheet: Figure 4-Figure Supplement 1g
Figure 4-Figure Supplement 1g
		con																	ko
		751	625	724	632	890	850	1003	814	772	757	727	828	577	710	854	647	699	583	781	706	706	589	431	766	750
