# Supplementary material for: Kindlin-2 inhibits TNF/NF-κB-Caspase 8 pathway in hepatocytes to maintain liver development and function
Source: eLife journal article supplement (doi:10.7554/elife.81792), 2023-01-09
Supplement: fig4-figsupp2-data1 [file Figure 4-Figure Supplement 2-Source data1.xlsx]

## Sheet: Figure 4-Figure Supplement 2a
	Figure 4-Figure Supplement 2a

## Sheet: Figure 4-Figure Supplement 2b
	Figure 4-Figure Supplement 2b
	shnc			shk2#1			shK2#2
	1.34303	0.820043	0.836929	0.35124	0.28513	0.22187	0.33258	0.21473	0.18624

## Sheet: Figure 4-Figure Supplement 2c
	Figure 4-Figure Supplement 2c
		shnc			shk2#1			shK2#2
	Tnfa	1.08784	1.03962	0.872536	2.82053	2.1174	2.48225	2.37893	2.15586	2.52236
	Birc3	1.15876	0.813858	1.02738	1.93345	2.65301	2.62698	1.83303	2.68451	2.5958

## Sheet: Figure 4-Figure Supplement 2d
	Figure 4-Figure Supplement 2d
	shnc			shk2#1			shK2#2
	1.648	1.548	1.603	4.215	4.361	5.025	4.82	4.6	3.88
