# Supplementary material for: Kindlin-2 inhibits TNF/NF-κB-Caspase 8 pathway in hepatocytes to maintain liver development and function
Source: eLife journal article supplement (doi:10.7554/elife.81792), 2023-01-09
Supplement: supp [file Figure 1-Figure Supplement 1-Source data1.xlsx]

## Sheet: Figure 1-Figure Supplement 1a
	Figure 1-Figure Supplement 1a
	WT						KO
	1.10268	1.0133	0.991629	1.02099	0.930812	0.940578	0.410901	0.418826	0.500549	0.461151	0.52226	0.68433

## Sheet: Figure 1-Figure Supplement 1b
	Figure 1-Figure Supplement 1b

## Sheet: Figure 1-Figure Supplement 1c
	Figure 1-Figure Supplement 1c
