# Supplementary material for: Kindlin-2 inhibits TNF/NF-κB-Caspase 8 pathway in hepatocytes to maintain liver development and function
Source: eLife journal article supplement (doi:10.7554/elife.81792), 2023-01-09
Supplement: supp [file Figure 1-Figure Supplement 2-Source data1.xlsx]

## Sheet: Figure 1-Figure Supplement 2a
	WT													KO
BMD	0.2255	0.2647	0.2267	0.2087	0.2144	0.2918	0.2812	0.2522	0.3625	0.2839	0.308	0.2835	0.2966	0.2702	0.1846	0.2342	0.1917	0.175	0.1772	0.1652	0.2094	0.1703	0.1906	0.1831
BV/TV	11.1234	13.6858	10.9813	8.72655	10.1513	16.8962	15.7877	12.3215	23.4616	15.8805	18.2085	15.7931	17.6958	14.4593	8.30161	10.6697	8.63196	6.41596	7.46416	6.89934	9.6462	7.64684	8.20118	8.03353
Tb Th	44.7156	47.5318	43.5148	45.0978	44.161	49.4967	49.0126	44.7524	56.5149	49.582	50.1726	50.7636	53.4348	44.8763	44.7036	45.6047	42.3253	41.3004	42.9454	40.2092	43.9696	45.2162	43.6948	45.3151
Tb.Sp	270.081	217.648	249.539	315.006	268.115	194.782	193.512	245.544	173.756	215.302	200.003	206.536	220.361	202.177	312.524	233.28	255.062	308.084	308.639	378.887	266.053	310.547	280.634	301.502
TbN	0.00249	0.00288	0.00252	0.00194	0.0023	0.00341	0.00322	0.00275	0.00415	0.0032	0.00363	0.00311	0.00331	0.00322	0.00186	0.00234	0.00204	0.00155	0.00174	0.00172	0.00219	0.00169	0.00188	0.00177
Ct Th	145.019	164.435	155.711	159.667	154.637	184.02	176.46	160.804	186.863	149.185	162.34	177.968	174.849	134.415	143.531	134.462	132.479	133.132	140.154	130.53	141.951	135.965	133.058	145.598
