# Supplementary material for: Kindlin-2 inhibits TNF/NF-κB-Caspase 8 pathway in hepatocytes to maintain liver development and function
Source: eLife journal article supplement (doi:10.7554/elife.81792), 2023-01-09
Supplement: supp [file Figure 1-Figure Supplement 3-Source data1.xlsx]

## Sheet: Figure 1-Figure Supplement 3a
	Figure 1-Figure Supplement 3
	con									ko
	18.35	23.65	17.99	29.61	32.21	22.67	21.66	30.45		102.36	113.52	124.66	130.24	89.95	96.32	67.89	66.92

## Sheet: Figure 1-Figure Supplement 3b
	Figure 1-Figure Supplement 3b
	con										ko
	20.32	19.24	14.65	21.36	22.29	19.33	16.68	18.99			87.99	102.36	117.68	92.64	74.36	69.25	125.3	136.64

## Sheet: Figure 1-Figure Supplement 3c
	Figure 1-Figure Supplement 3c
	con										ko
	14.09	16.06	16.75	17.81	19.41	19.21	20.34	15.74			100.08	115.58	105.16	125.33	99.66	121.83	102.41	91.8

## Sheet: Figure 1-Figure Supplement 3d
	Figure 1-Figure Supplement 3d
	WT							KO
	0.7967	0.7217	0.6102	0.7681	0.72	0.9	1	1.0377	1.08	1.13	1.07	0.9	0.94

## Sheet: Figure 1-Figure Supplement 3e
	Figure 1-Figure Supplement 3e
	WT						KO
	1.219	1.3025	1.2081	1.31	1.78	1.83	0.21	0.5	0.33	1.16	1.25

## Sheet: Figure 1-Figure Supplement 3f
	Figure 1-Figure Supplement 3f
	WT										KO
	2.7149	2.8959	2.7982	2.5716	2.7104	2.9	3.71	3.74			5.5897	3.6354	3.8288	5.2	4.3	4.95	3.81	3.63

## Sheet: Figure 1-Figure Supplement 3g
	Figure 1-Figure Supplement 3g
	WT								KO
	172.4	144.4	156.8	249.8	212.4	312	232.2		719.1	447.1	280	338.3	312.5	201	402.8
