# Supplementary material for: Kindlin-2 inhibits TNF/NF-κB-Caspase 8 pathway in hepatocytes to maintain liver development and function
Source: eLife journal article supplement (doi:10.7554/elife.81792), 2023-01-09
Supplement: supp [file Figure 1-Source data1.xlsx]

## Sheet: Figure 1a
		Source data-Figure 1a
			WT	KO
		32	1
		32	1
		30	1
		29	1
		30	1
		33	1
		33	1
		32	1
		30	1
		29	1
		34	1
		32	1
		34	1
		28	1
		30	1
		32	1
		34	1
		30	1
		31	1
		29	1
		31	1
		29	1
		31	1
		32	1
		33	1
		33	1
		34	1
		31	1
		30	1
		31	1
		50		1
		50		1
		50		1
		50		1
		50		1
		50		1
		50		1
		50		1
		50		1
		50		1
		50		1
		50		1
		50		1
		50		1
		50		1
		50		1
		50		1
		50		1
		50		1
		50		1
		50		1
		50		1
		50		1
		50		1
		50		1
		50		1
		50		1
		50		1
		50		1
		50		1

## Sheet: Figure 1b
		Source data-Figure 1a
		WT
		17.32	15.83	18.01	18.14	17.05	16.01	14.84	16.47	16.95	14.47	15	17.2	13.83	14.51	14.47
		KO
		18.06	12.65	15.8	14.73	10.2	14.17	16.01	11.44	15.14	15.56	13.3

## Sheet: Figure 1c
	Source data-Figure 1c
	WT
	0.777	0.6722	0.8767	0.8033	0.7305	0.6796	0.762	0.6926	0.7917	0.7017	0.6998	0.7861	0.6736	0.6482
	KO
	0.6628	0.8623	0.6686	0.5463	0.6583	0.7568	0.5371	0.6996	0.6783	0.4917

## Sheet: Figure 1h
	Source data-Figure 1h
		WT								KO
	TBIL	1.4	1.6	0.5	0.9	0.5	0.9	0.4	0.4	18.8	4.2	16.5	3.9	9.1	2.5	4.8
	DBIL	3.6	0.3	2	1.8	1.6	2.4	1.4	1.5	17.4	5.6	17.6	7.1	9.6	6.6	5.5

## Sheet: Figure 1i
	Source data-Figure 1i
		WT												KO
	2W	31.2	19.3	23.2	23	25	28	19						19.7	25	25.5	22.6	24	22.9	24	26
	3W	24.7	20.8	18.9	22	23.7	11.1817	22.3462	23.8343	31.8757				31.5	37.1	27.3	47.4	53.6	50.238	64.8952	40.9
	4W	19.36	21.8177	19.4174	17.7381	21.8871	21.0303	22.7731	19.7164	16.4191	19.1838	38.2871		414.356	191.281	223.724	348.915	67.1676	259.359	215.222	198.361	369.238	355.233

## Sheet: Figure 1j
	Source data-Figure 1j
		WT														KO
	2W	70	80.7	63.9	65	66	71	67								89.4	73.6	96.4	87.8	94.2	96.3	86
	3W	77.5	77.6	76.3	63.1	68.7201	75.0222	70.2588								106.7	92.6	83.3	93.1	131.6	136.398	132.914	93.8
	4W	61.4821	65.8551	65.1052	69.2085	66.693	69.6744	59.3998	73.8676	72.8173	78.0404	68.3175				594.554	310.882	278.91	572.261	129.836	489.333	386.248	362.115	399.863	402.378

## Sheet: Figure 1k
	Source data-Figure 1k
		WT														KO
	2W	43	42	43.5	44	41	42	43								43.6	44.7	43.5	42.6	40.3	42	43
	3W	47	45	45.5	47.1	46	47	46								42	43.6	45.1	43.2	45.1
	4W	39.398	41.0281	40.6413	38.3758	44.3435	43.4042	44.7027	44.9237	43.8462	38.956	50.1	51.2	54.3	51.8	21.5225	7.432	41.5531	44.9513	46	44.3	29.9	47.8

## Sheet: Figure 1n
	Source data-Figure 1n
		WT						KO
	Apoa	0.786274	0.753394	0.875368	0.902538	1.41541	1.26701	1.34083	1.29546	0.941734	1.016	0.763626	0.938448
	Fbn	0.834366	1.01965	1.00522	0.954918	1.13462	1.05123	1.18349	1.19389	1.03073	1.16994	0.802738	0.833014
	Gs	1.06639	1.3046	1.11077	0.791796	0.839216	0.887239	1.11272	1.28366	1.10786	1.09766	0.831198	1.02233
	Ttr	1.03788	1.07512	0.810751	0.87317	1.084	1.11907	0.731681	0.731149	0.85937	0.97107	0.598472	0.729066

## Sheet: Figure 1o
	Source data-Figure 1o
		WT						KO
	Apoa	0.687659	1.01758	0.892656	1.13498	0.886784	1.38034	1.25289	0.777739	1.6848	0.872045	1.08102	0.907489
	Fbn	1.14496	0.936903	1.10519	1.11297	0.907482	0.792506	0.790353	0.777478	0.778073	0.728008	0.713964	0.768596
	Gs	1.00209	1.23114	0.919704	0.729522	1.03166	1.08588	1.1279	1.1897	0.906672	1.01478	0.908493	1.13213
	Ttr	0.916528	0.987098	0.856717	1.03742	1.04889	1.15335	0.592877	0.79195	0.720653	0.818328	1.05986	0.830644

## Sheet: Figure 1p
	Source data-Figure 1p
		WT						KO
	Apoa	0.781228	0.992369	1.01529	1.36936	1.01221	0.829547	0.299824	0.315993	0.409378	0.357774	0.406688	0.554602
	Fbn	0.7761	0.843004	1.3104	1.32492	0.855989	0.889586	0.678208	0.687653	0.598635	0.542275	0.776935	0.532359
	Gs	0.916875	0.771323	1.03205	1.26653	1.07142	0.941805	0.224394	0.221444	0.340265	0.304123	0.474262	0.581888
	Ttr	1.32152	1.43557	0.893526	0.895551	0.753472	0.700364	0.0775542	0.123637	0.105534	0.146909	0.184138	0.22549
