# Supplementary material for: Kindlin-2 inhibits TNF/NF-κB-Caspase 8 pathway in hepatocytes to maintain liver development and function
Source: eLife journal article supplement (doi:10.7554/elife.81792), 2023-01-09
Supplement: supp [file Figure 3-Source data1.xlsx]

## Sheet: Figure 3c
	Figure 3c
	WT						KO
	1.9	2.6	3.4	3.6	4.2	2.8	6.7	7.9	8.6	9.4	10.1	13.2

## Sheet: Figure 3d
	Figure 3d
	WT						KO
	2.3	3.1	2.6	1.8	1.9	2	8.9	6.8	11.2	13.5	11.8	12.6

## Sheet: Figure 3e
	Figure 3e

## Sheet: Figure 3g
	Figure 3g
		WT						KO
	Col1a1	1.57167	1.60004	0.760397	0.857711	0.58106	0.629129	12.7164	20.2586	23.1082	16.2867	19.2776	31.1174
	Tgfb1	1.07788	1.09278	1.10146	0.750716	0.988198	0.988976	3.75305	4.23747	4.10659	2.61371	4.67217	6.14925
	Timp1	1.52678	1.13809	0.800153	1.10991	0.850246	0.574822	57.3515	50.1546	129.593	109.117	225.692	298.334
	Acta2	1.57551	1.08888	0.946209	1.08485	0.660767	0.643777	4.23145	4.6256	11.3113	10.8161	13.2421	17.4061
	Col6a	1.29887	1.16865	0.95651	0.675339	1.03215	0.868474	13.7778	16.6542	15.0527	12.0606	29.6571	28.3537
