# Supplementary material for: Kindlin-2 inhibits TNF/NF-κB-Caspase 8 pathway in hepatocytes to maintain liver development and function
Source: eLife journal article supplement (doi:10.7554/elife.81792), 2023-01-09
Supplement: supp [file Figure 4-Source data1.xlsx]

## Sheet: Figure 4c
	Figure 4c
	WT							KO
	3	7	8	5	8	10	4	20	21	22	23	11	25	26	13

## Sheet: Figure 4d
	Figure 4d
		WT						KO
	2W	1.25595	0.86619	1.26628	0.492051	0.992975	1.12656	0.970649	1.11807	1.12466	2.36615	1.84155	2.35025
	3W	0.747851	1.12437	1.02733	0.9105	1.17295	1.017	2.29415	2.27918	1.40515	1.29008	1.73048	4.27195
	4W	0.573024	0.473385	1.35684	1.52442	1.09613	0.976208	1.4676	1.71254	3.10161	3.25169	3.61637	4.31833

## Sheet: Figure 4h
Figure 4h
WT																	KO
1.67	4.81	2.25	2.21	3.96	4.25	2.08	3.25	3.43	2.74	3.21	3.75	2.22	2.56	4.42	2.88	2.14	5.42	7.03	5.05	3.73	5	2.76	3.32	4.32

## Sheet: Figure 4i
Figure 4i
WT																	KO
0.19	0.47	0.35	0.32	0.94	0.81	0.46	0.55	0.65	0.43	0.55	0.53	0.67	0.63	0.79	0.31	0.3	3.09	1.97	2.48	1.32	3.05	1.83	0.45	1.2

## Sheet: Figure 4j
Figure 4j
WT																	KO
0.02	0.09	0.05	0.02	0.04	0.01	0.11	0.02	0.05	0.03	0.02	0.02	0.08	0.04	0.07	0.02	0.06	0.05	0.23	0.15	0.17	0.1	0.12	0.03	0.21

## Sheet: Figure 4k
	Figure 4k

## Sheet: Figure 4l
	Figure 4l
	shnc			shk2 #1			shk2 #2
	1.16581	0.768071	1.06612	0.2451	0.35612	0.28741	0.28546	0.36512	0.22513

## Sheet: Figure 4m
	Figure 4m
		shnc			shk2 #1			shk2 #2
	Tnfa	0.934438	1.07115	0.99441	3.86197	4.11443	4.74769	3.79908	4.28766	3.46042
	Birc3	0.958324	0.979007	1.06267	2.05867	2.21584	3.27631	3.35061	2.82356	2.93455

## Sheet: Figure 4n
	Figure 4n
	shnc			shk2 #1			shk2 #2
	1.47	1.56	1.62	4.42	5.62	5.47	4.32	4.51	3.16
