# Supplementary material for: Kindlin-2 inhibits TNF/NF-κB-Caspase 8 pathway in hepatocytes to maintain liver development and function
Source: eLife journal article supplement (doi:10.7554/elife.81792), 2023-01-09
Supplement: supp [file Figure 5-Source data1.xlsx]

## Sheet: Figure 5a
	Figure 5a
		KO	KO;TNFR-/-
	33	1
	29	1
	30	1
	29	1
	30	1
	33	1
	30	1
	30	1
	30	1
	29	1
	34	1
	32	1
	34	1
	33	1
	30	1
	32	1
	34	1
	30	1
	31	1
	32	1
	31	1
	29	1
	31	1
	32	1
	33	1
	35	1
	34	1
	29	1
	30	1
	31	1
	100		1
	100		1
	100		1
	100		1
	100		1
	100		1
	100		1
	100		1
	100		1
	100		1
	100		1
	100		1
	100		1
	100		1
	100		1
	100		1
	100		1
	100		1
	100		1
	100		1
	100		1
	100		1
	100		1
	100		1
	100		1
	100		1
	100		1
	100		1
	100		1
	100		1
	100		1
	100		1
	100		1

## Sheet: Figure 5b
	Figure 5b
	con						TNFR-/-						KO						KO;TNFR-/-
	27.3	31.5	38.7	29	29.4	36.7	31.8	36.8	41.2	30.4	24.6	28.6	403.5	250.3	463.9	178.3	522.5	489.2	60.5	102.2	135.8	63.5	74.3	76.8

## Sheet: Figure 5c
	Figure 5c
	con						TNFR-/-						KO						KO;TNFR-/-
	89	79.8	72.6	84.2	69.1	59.8	71.3	70.6	68.9	72.3	76.8	80.2	443.9	378.3	493.5	280.3	757.2	613.7	92.8	129.5	131.4	64.6	84.3	90.5

## Sheet: Figure 5k
	Figure 5k
		con						TNFR-/-						KO						KO;TNFR-/-
	Apoa	1.1753	1.00523	0.93414	0.86427	1.14307	0.877986	1.1518	1.11078	0.850067	0.829699	1.26881	0.851646	0.482922	0.452394	0.429058	0.711175	0.655659	0.759433	1.17971	1.02286	0.897707	0.821182	0.666771	0.651667
	Fbn	1.21631	0.912251	0.49824	1.12301	1.39207	0.858119	1.19198	1.00804	0.453398	1.07809	1.5452	0.832375	0.868739	0.669339	0.752335	0.799538	0.579928	0.492119	1.0884	0.698258	0.856607	0.578459	0.80532	0.997403
	Gs	1.2214	1.27966	0.780358	1.11698	0.632887	0.968711	1.19697	1.41402	0.710126	1.0723	0.702505	0.93965	0.480535	0.495634	0.388853	0.251196	0.877592	0.878625	1.0871	0.612461	0.821993	0.738672	0.922776	0.698296
	Ttr	1.06202	1.24392	0.832832	0.782745	1.0546	1.02387	1.04078	1.37454	0.757877	0.751435	1.17061	0.993155	0.602016	0.780856	0.670612	0.628564	0.838227	0.795182	1.04005	1.01874	1.02124	1.0077	0.704389	1.04211

## Sheet: Figure 5l
	Figure 5l
		con						TNFR-/-						KO						KO;TNFR-/-
	Col1a1	0.922357	0.984693	1.08098	1.07831	0.931998	1.00166	0.90391	1.08809	0.983693	1.03518	1.03452	0.971607	10.2089	14.1386	18.4915	17.351	21.1896	20.1829	1.33078	0.965549	1.40665	1.28619	1.03231	1.00342
	Tgfb	1.06011	0.865259	0.791235	0.914846	1.20893	1.15962	1.0389	0.956112	0.720024	0.878252	1.34191	1.12483	4.53197	5.42517	6.64964	3.56983	5.64008	4.65995	0.961063	1.45081	1.54568	1.27744	0.893994	1.05473
	Timp1	0.874773	0.947244	1.30309	0.975604	0.734761	1.16453	0.857278	1.0467	1.18581	0.93658	0.815585	1.12959	100.752	78.7995	67.5799	87.4921	56.1955	66.0026	1.35936	0.970218	0.84273	0.96301	1.55053	1.45269
	Acta2	1.16486	0.93038	1.19923	1.02591	0.839364	0.840258	1.14156	1.02807	1.0913	0.984875	0.931694	0.81505	8.65584	7.48292	6.45239	8.42906	7.71117	6.65566	0.894411	0.972211	1.0395	1.01134	1.68042	1.24036
	Col6a	0.834007	1.28555	0.83207	0.829568	1.34629	0.872512	1.0389	0.956111	0.720024	0.878252	1.34191	1.12483	11.771	10.8915	11.178	14.13	10.1759	9.97745	1.46111	1.57611	1.33568	0.959438	1.3599	1.17133

## Sheet: Figure 5n
	Figure 5n
	con						TNFR-/-						KO						KO;TNFR-/-
	0.1	0.18	0.09	0.08	0.11	0.2	0.1	0.2	0.3	0.1	0.2	0.2	2	2.3	2.4	3.4	2.8	3	0.22	0.25	0.32	0.31	0.36	0.28
