# Supplementary material for: Kindlin-2 inhibits TNF/NF-κB-Caspase 8 pathway in hepatocytes to maintain liver development and function
Source: eLife journal article supplement (doi:10.7554/elife.81792), 2023-01-09
Supplement: supp [file Figure 6-Source data1.xlsx]

## Sheet: Figure 6a
		Figure 6a
			KO	KO;cas8-/-
		34	1
		28	1
		31	1
		28	1
		31	1
		32	1
		31	1
		29	1
		31	1
		28	1
		35	1
		31	1
		35	1
		32	1
		31	1
		31	1
		34	1
		29	1
		31	1
		31	1
		32	1
		28	1
		32	1
		31	1
		34	1
		34	1
		35	1
		28	1
		31	1
		30	1
		70		1
		70		1
		70		1
		70		1
		70		1
		70		1
		70		1
		70		1
		70		1
		55		1
		60		1
		70		1
		48		1
		70		1
		70		1
		70		1
		70		1
		70		1
		70		1
		70		1
		70		1
		70		1
		70		1
		70		1
		70		1
		61		1
		70		1
		70		1
		62		1
		70		1

## Sheet: Figure 6b
	Figure 6b
	con								cas8-/-								KO								KO;casp8-/-
	29.5439	25.6137	27.3252	30.6044	29.8798	43.1277	51.0031	25.019	28.36	31.25	30.9104	30.1786	43.559	51.5131	25.2692	35.2029	333.5	424.3	226.8	425.1	232.6	328.46	325.3	378.2	41.2471	39.7392	40.3063	41.8291	180.761	46.7106	32.2929	272.939

## Sheet: Figure 6c
	Figure 6c
	con								cas8-/-								KO								KO;casp8-/-
	69.5711	57.615	60.3075	52.9955	69.4153	70.1452	68.6409	44.0836	53.5255	70.1094	70.8466	69.3273	44.5244	56.8	61.6113	56.321	564.6	654.3	453.5	353.5	590.6	523.3	436.62	488.36	66.1443	61.8385	67.8999	62.4482	287.824	74.4398	64.9782	189.634

## Sheet: Figure 6i
	Figure 6i
		con						cas8-/-						KO						KO;casp8-/-
	Apoa	0.831406	0.810017	1.13931	1.0722	1.16123	0.985839	0.808755	0.967232	0.897161	0.850421	0.891451	0.976425	0.719792	0.686734	0.690814	0.756875	0.63293	0.751847	0.86375	0.892755	0.828977	0.983937	0.759516	0.977401
	Fbn	0.940332	0.931075	0.89089	0.867971	1.22083	1.14891	0.844012	0.942785	1.32005	1.27671	1.223	1.14946	0.751171	0.669377	0.916439	0.913627	0.86833	0.885086	0.901405	0.87019	1.01973	1.07715	1.042	1.15061
	Gs	1.39586	1.21422	0.878074	0.86943	0.831905	0.810504	0.90491	0.924899	0.848798	0.865029	1.07116	1.35995	0.80537	0.656678	0.653574	0.769876	0.760527	0.947159	0.966444	0.853682	0.784289	1.00084	0.912632	1.06131
	Ttr	1.32354	1.06078	0.707551	0.58153	1.3255	1.0011	0.87719	0.769464	0.921395	0.769893	1.22512	1.43694	0.780699	0.54632	0.709474	0.685205	0.869832	0.906446	0.936839	0.810216	0.851369	0.890766	1.0438	1.03838

## Sheet: Figure 6j
	Figure 6j
		con						cas8-/-						KO						KO;casp8-/-
	Col1a1	1.12838	1.0198	0.725076	0.904647	1.22083	1.00126	1.03481	0.844612	0.772354	0.893015	1.18008	1.13195	10.2343	8.20118	8.31825	8.83192	11.4586	12.1911	2.04685	2.46035	1.66365	2.64958	2.29172	2.43822
	Tgfb	1.07335	1.2125	1.02564	0.849309	0.827357	1.01184	0.826088	0.755415	0.87343	1.1542	1.10712	1.15215	8.17001	7.33508	9.40684	11.4151	10.7502	12.4087	1.634	2.20052	1.88137	3.42452	2.15003	2.48174
	Timp1	1.16006	1.01458	1.25176	1.07503	0.660619	0.837956	1.83776	1.55697	0.586305	0.929237	0.732848	0.695214	36.553	30.6879	12.1776	18.4825	14.4444	14.4396	7.3106	9.20638	2.43551	5.54476	2.88889	2.88792
	Acta2	0.719306	0.861333	0.719707	1.14525	1.34327	1.21113	1.49504	1.10845	1.0972	1.09448	1.04572	1.28501	5.2314	6.23512	6.58974	6.74125	8.21451	4.32221	3.12451	2.87145	1.02145	1.98245	2.03184	1.54876
	Col6a	0.809452	0.826645	1.16311	1.02882	1.08599	1.08599	0.83783	1.23966	1.47386	0.555008	0.879636	0.693729	8.28614	12.0371	15.8735	5.48903	8.54126	7.47147	1.65723	3.61113	3.1747	1.64671	1.70825	1.49429

## Sheet: Figure 6l
	Figure 6l
	con						cas8-/-						KO						KO;casp8-/-
	0.12	0.18	0.09	0.11	0.13	0.08	0.11	0.12	0.09	0.09	0.14	0.12	2.9	3.6	3.8	2.5	4.3	3.6	1.2	2.1	1.9	1.6	1.8	1.8
