# Supplementary material for: Kindlin-2 inhibits TNF/NF-κB-Caspase 8 pathway in hepatocytes to maintain liver development and function
Source: eLife journal article supplement (doi:10.7554/elife.81792), 2023-01-09
Supplement: supp [file Figure 7-Figure Supplement 1-Source data1.xlsx]

## Sheet: Figure 7-Figure Supplement 1a
	Figure 7-Figure Supplement 1a
	AAV-GFP						AAV-K2
	42.31	41.32	28.65	34.62	33.28	37.85	36.51	41.05	39.36	26.38	29.64	33.61

## Sheet: Figure 7-Figure Supplement 1b
	Figure 7-Figure Supplement 1b
	AAV-GFP						AAV-K2
	58.36	48.31	46.38	47.98	46.28	44.21	48.92	39.67	54.85	50.24	41.85	40.78
