# Supplementary material for: Kindlin-2 inhibits TNF/NF-κB-Caspase 8 pathway in hepatocytes to maintain liver development and function
Source: eLife journal article supplement (doi:10.7554/elife.81792), 2023-01-09
Supplement: supp [file Figure 7-Source data1.xlsx]

## Sheet: Figure 7a
	Figure 7a

## Sheet: Figure 7b
	Figure 7b
	Saline						GalN/LPS
	1.12634	1.00104	1.04524	0.995881	0.899322	0.93218	0.532008	0.546001	0.629376	0.599534	0.544474	0.603563

## Sheet: Figure 7d
	Figure 7d

## Sheet: Figure 7e
	Figure 7e
	AAV-GFP			AAV-K2
	0.916982	1.11482	0.968196	1.98313	1.98975	1.92748

## Sheet: Figure 7f
	Figure 7f
		AAV-GFP	AAV-K2
	12	1
	11	1
	11	1
	13	1
	16	1
	9	1
	11	1
	14	1
	10	1
	9	1
	8	1
	12	1
	6	1
	11	1
	12	1
	16		1
	14		1
	7		1
	9		1
	15		1
	14		1
	16		1
	13		1
	8		1
	14		1
	17		1
	16		1
	11		1
	12		1
	48		1

## Sheet: Figure 7h
	Figure 7h
	AAV-GFP								AAV-K2
	601.3	654.2	669.32	689.24	676.2	634.51	667.32	618.1	542.3	555.6	512.4	492.3	476.5	461.2	410.2	403.6

## Sheet: Figure 7i
	Figure 7i
	AAV-GFP								AAV-K2
	689.2	674.3	702.6	722.2	735.4	765.9	798	710.3	598	600.2	510.3	578.3	599.6	602.5	623.5	612.4

## Sheet: Figure 7m
	Figure 7m
	AAV-GFP						AAV-K2
	46	49	52	56	57	60	41	39	38	35	32	48
