# Supplementary figures and images for: Kindlin-2 inhibits TNF/NF-κB-Caspase 8 pathway in hepatocytes to maintain liver development and function
Source: eLife journal article supplement (doi:10.7554/elife.81792), 2023-01-09

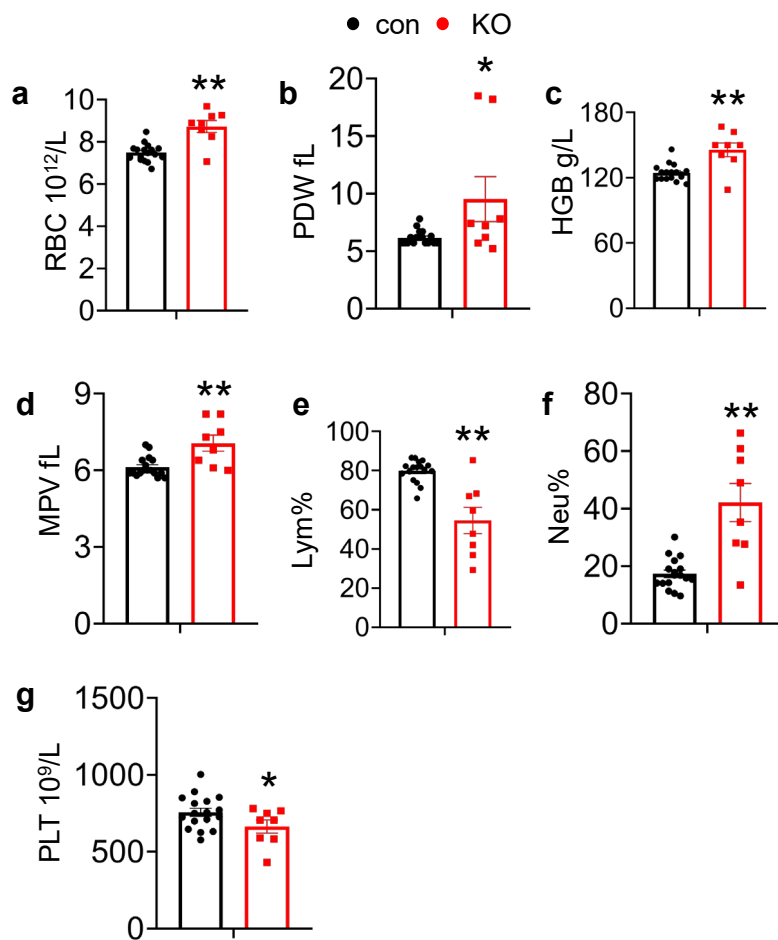

Supplement: supp [file elife-81792-supp-v1.zip]

● sh-NC ● sh-K2<sup>#1</sup> ● sh-K2<sup>#2</sup>

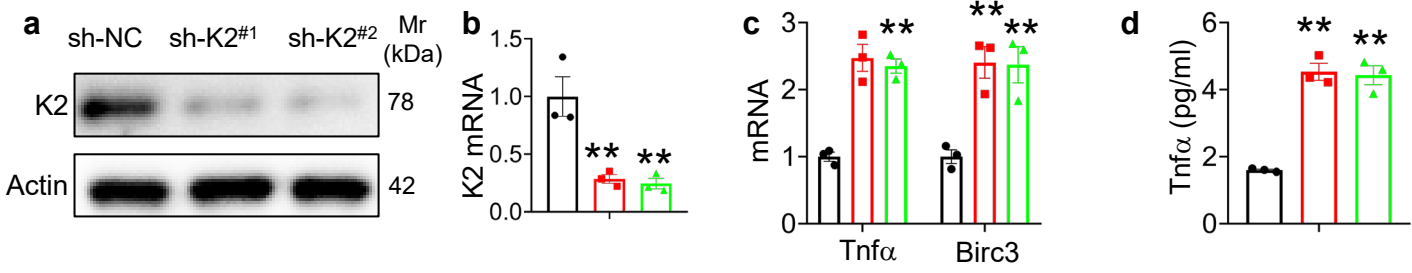

Supplement: supp [file elife-81792-supp-v1.zip]

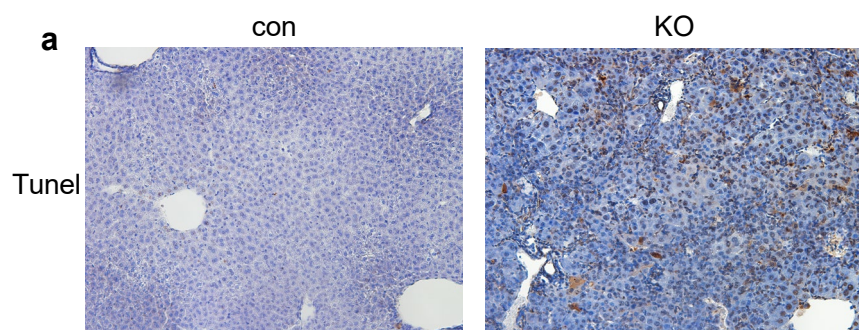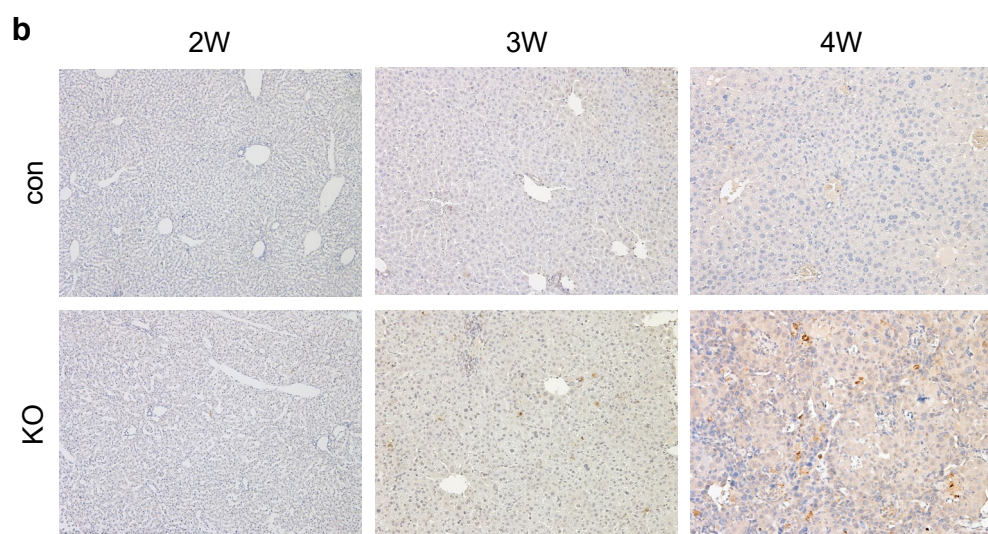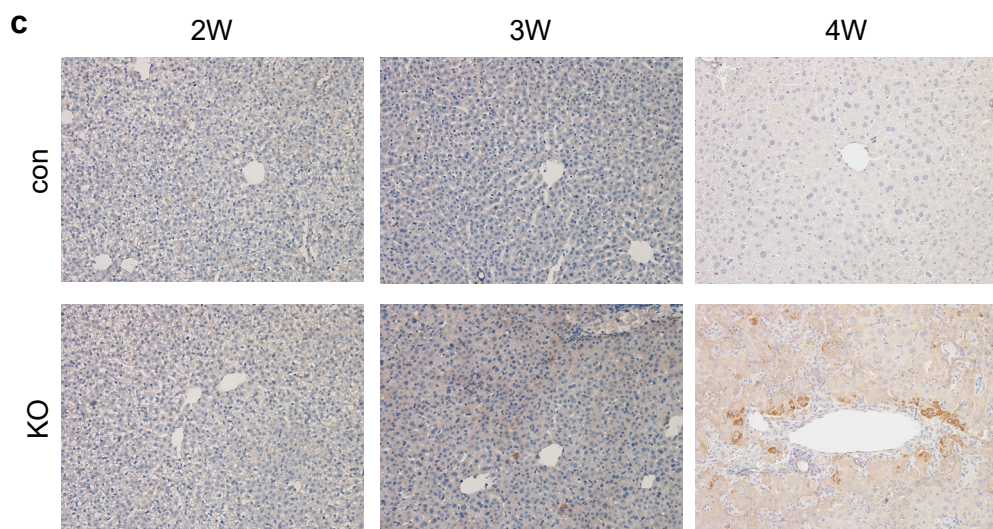

Supplement: supp [file elife-81792-supp-v1.zip]

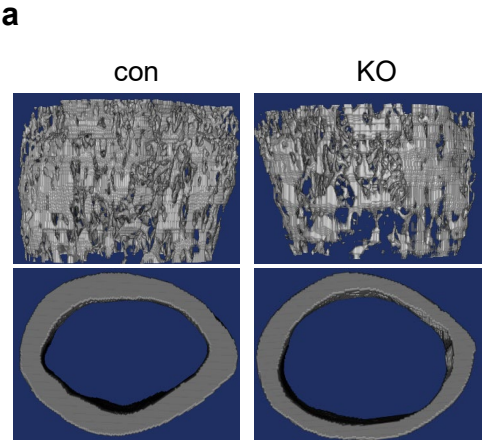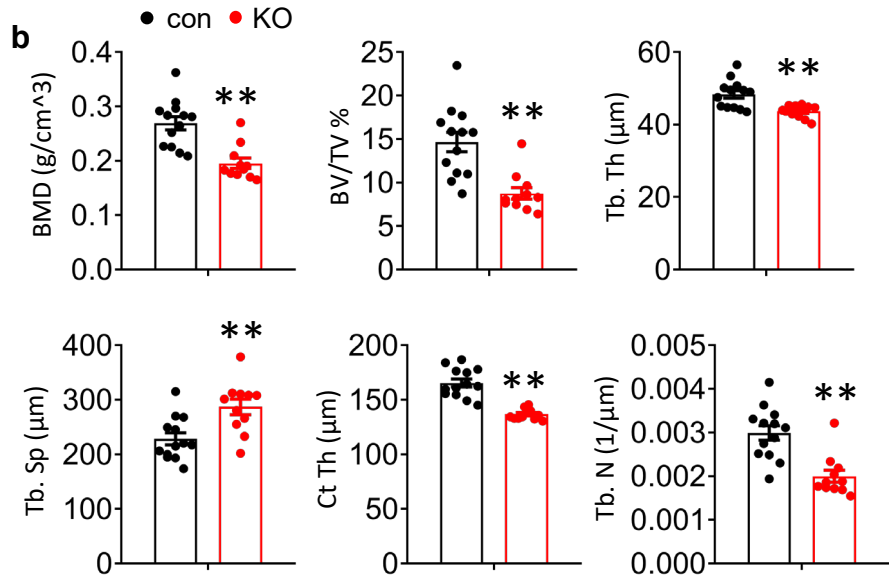

Supplement: supp [file elife-81792-supp-v1.zip]

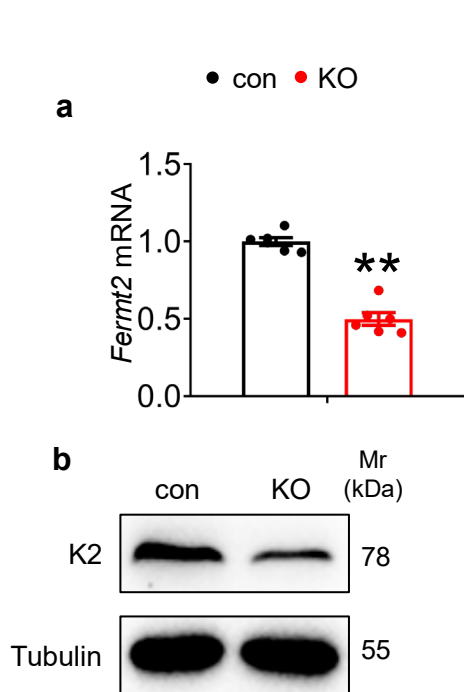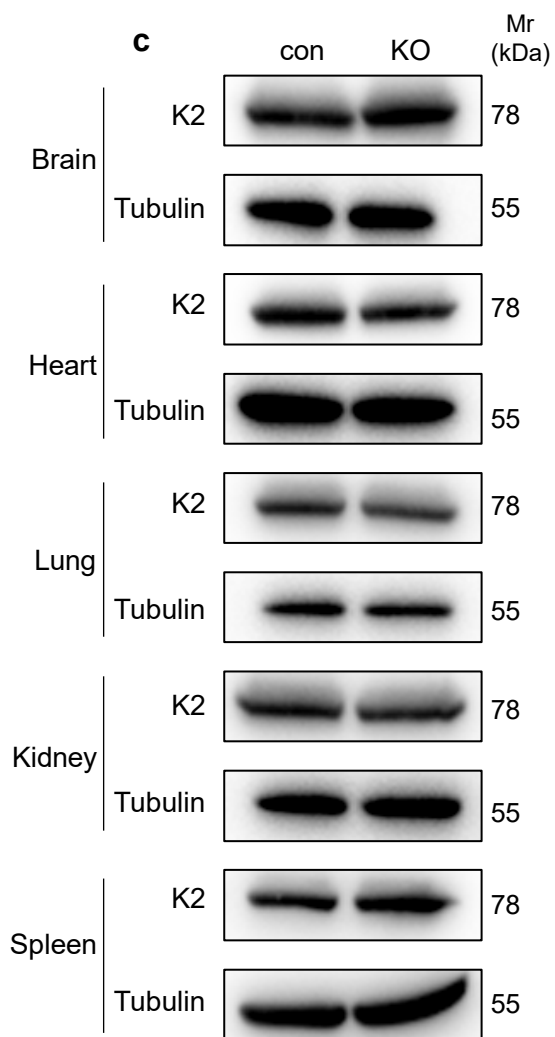

Supplement: supp [file elife-81792-supp-v1.zip]

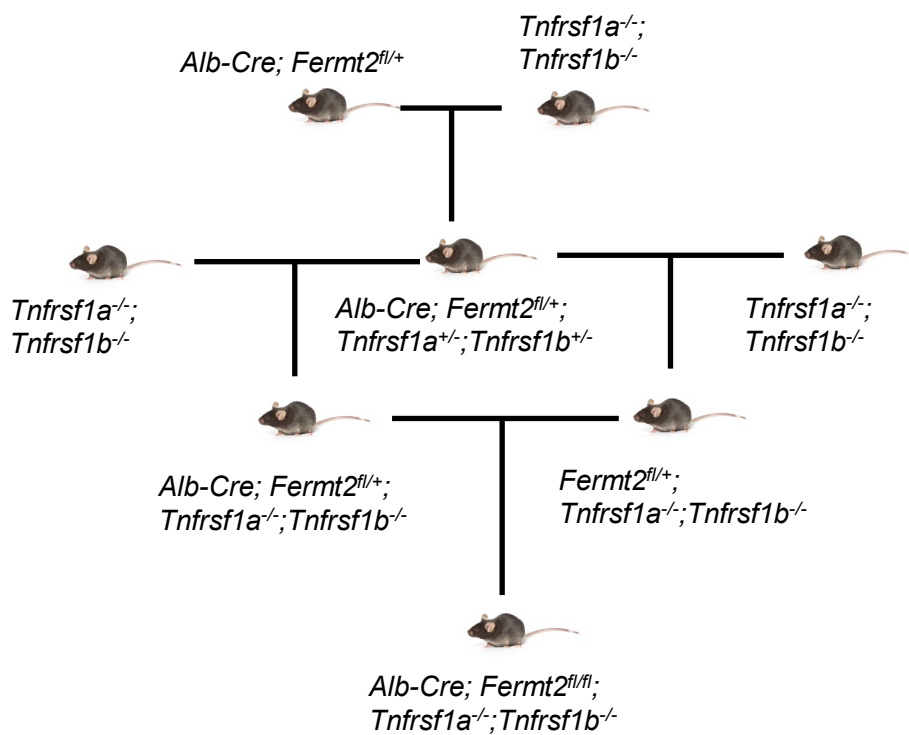

Supplement: supp [file elife-81792-supp-v1.zip]

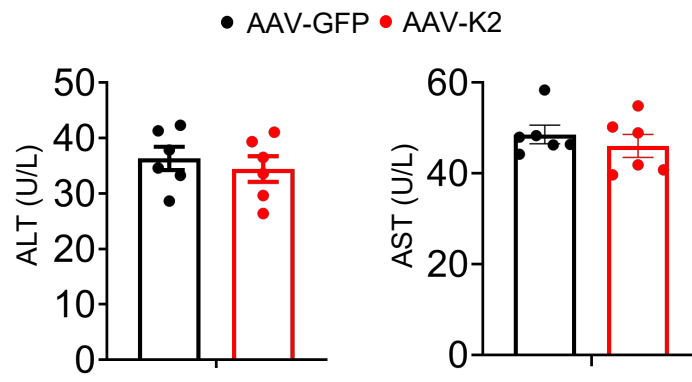

Supplement: supp [file elife-81792-supp-v1.zip]

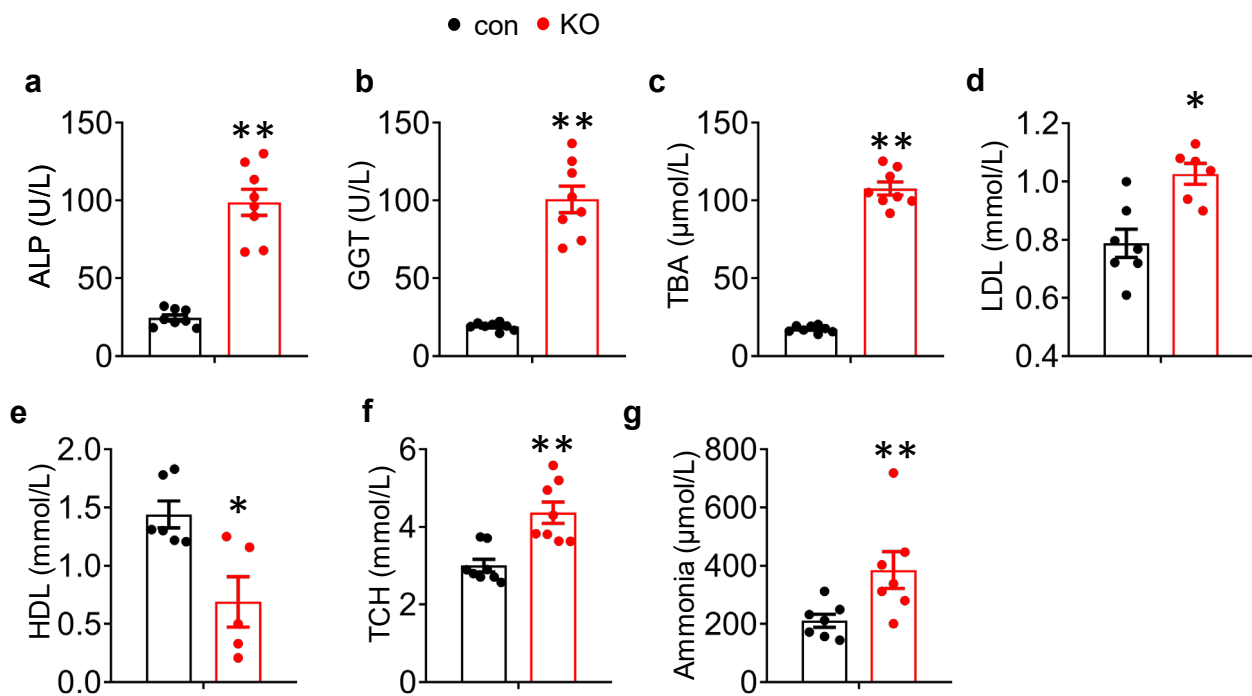

Supplement: supp [file elife-81792-supp-v1.zip]
